# Neural correlates of auditory enhancement in humans

Lei Feng<sup>1</sup>, Anahita H. Mehta<sup>1</sup> and Andrew J. Oxenham

Department of Psychology, University of Minnesota, 75 East River Parkway, Minneapolis, Minnesota  
55455, USA

fengl@umn.edu

mehta@umn.edu

oxenham@umn.edu

**Running title:** Neural correlates of auditory enhancement

<sup>1</sup> These authors contributed equally to this work.

1 **ABSTRACT**

2 A target sound embedded within a background sound becomes perceptually more salient if the background  
3 is presented first by itself. This phenomenon, known as auditory enhancement, reflects a general principle  
4 of contrast enhancement, and may help in the detection of new acoustic events in the environment and in  
5 establishing the perceptual constancy of speech and other biologically relevant sounds under varying  
6 acoustic conditions. Surprisingly, no neural correlates of this important phenomenon have been reported in  
7 humans. Here we used the auditory steady state response (ASSR) to determine whether the neural response  
8 to the target is amplified under conditions of enhancement. We used a double-modulation paradigm,  
9 involving the simultaneous amplitude modulation of a tone with two modulation frequencies, to distinguish  
10 cortical from subcortical contributions to this phenomenon. Robust phase-locked neural responses to both  
11 the target and masker were identified at both cortical and subcortical levels. Consistent with perceptual  
12 results, the response to the target tone embedded in the simultaneous maskers increased in the presence of  
13 the precursor, whereas the response to the masker components remained constant across conditions. The  
14 quantitative pattern of results suggest that the enhancement effects emerge at a subcortical level but are  
15 further enhanced within the auditory cortex.

16

17 Keywords: auditory perception, contrast enhancement, perceptual invariance, EEG, ASSR

18

19

20

21

## 22 INTRODUCTION

23 A target embedded within a background sound can “pop out” perceptually if the background masker is  
24 presented by itself first. This phenomenon, commonly termed auditory enhancement (Viemeister, 1980;  
25 Viemeister and Bacon, 1982), has been demonstrated and quantified in many psychophysical studies. For  
26 instance, thresholds for detecting a target tone within a simultaneous masker can be improved (decreased)  
27 by presenting a copy of the masker in the form of a precursor (Viemeister, 1980). A precursor can also  
28 increase the effectiveness of a target tone in masking a subsequent probe tone, suggesting that the target’s  
29 neural representation has been amplified (Viemeister and Bacon, 1982). When the target is presented well  
30 above its detection threshold, its perceived loudness can be increased by a precursor (Wang and  
31 Oxenham, 2016), and it can become sufficiently salient to be perceived as a separate entity with a distinct  
32 pitch (Hartmann and Goupell, 2006; Erviti et al., 2011; Byrne et al., 2013; Demany et al., 2013; Feng and  
33 Oxenham, 2015).

34 Auditory enhancement may reflect processes in the auditory system that aim to adapt and  
35 normalize the representation of sound to improve coding efficiency (Barlow, 1961; Dean et al., 2005) and  
36 to sensitize the system to changes or new events in the acoustic environment (Stilp et al., 2010).  
37 Enhancement could therefore play an important role in everyday auditory perception. In addition, the size  
38 of the effect can be large, leading to effective amplification of the target of between 5 dB and 25 dB,  
39 depending on the task (Viemeister et al., 2013; Feng and Oxenham, 2015). Given the potential importance  
40 of auditory enhancement, it is surprising that relatively little is known about its neural origins. An earlier  
41 study in the auditory nerve of the guinea pig (Palmer et al., 1995) found that auditory-nerve fibers adapted  
42 to the precursor stimulus, so that the response to the masker was reduced more than the response to the  
43 target, leading to a relative enhancement of the target response. However, no evidence for an absolute  
44 enhancement of the target response was found, as would be needed to explain the perceptual phenomena  
45 described above (Viemeister and Bacon, 1982; Wang and Oxenham, 2016). Some enhancement has been  
46 reported in the cochlear nucleus, but it was limited to the onset of the target tone (Scutt and Palmer,

47 1998). In contrast, more robust enhancement effects have been found in the responses of single units  
48 within the inferior colliculus (IC) of awake passive marmoset monkeys (Nelson and Young, 2010). Taken  
49 together, the results suggest hierarchical processing, with enhancement only emerging at the level of the  
50 IC. However, such an interpretation must be tempered by the fact that the studies were carried out in  
51 different species, only the study of Nelson and Young (2010) was attempted in an awake preparation, and  
52 none of the studies included behavior. Evidence from human studies remains limited. Beim et al. (2015)  
53 found no evidence for enhancement in the cochlea, using otoacoustic emissions (OAEs), and Carcagno et  
54 al. (2014) found no evidence for enhancement in the 80-Hz auditory steady-state responses, which are  
55 thought to be primarily subcortical in origin (Herdman et al., 2002; Bidelman, 2018). Thus, it remains the  
56 case that no neural correlates of enhancement in humans have yet been reported.

57         Here we employed EEG to probe the neural correlates of enhancement at not only the sub-cortical  
58 but also the cortical level which has not been investigated in any previous studies. We used a stimulus  
59 design described by Feng and Oxenham (2015), which yields up to 24 dB of auditory enhancement, as  
60 measured behaviorally, potentially increasing the likelihood of observing neural correlates of the effect.  
61 In addition we used a frequency tagging paradigm that enables us to analyze the neural responses to the  
62 target and masker components separately. The target and masker components were tagged with a  
63 combination of low (around 40 Hz) and high (around 100 Hz) amplitude modulations (AMs), selected to  
64 investigate primarily cortical and sub-cortical responses, respectively. The responses to the target and  
65 masker were estimated by measuring the magnitude of auditory steady state responses (ASSRs) at these  
66 specific tagging frequencies. We observed increased responses to the target tone at both subcortical and  
67 cortical levels. The magnitude of the enhancement was larger at the cortical level, consistent with the  
68 concept of hierarchical processing, whereby enhancement is progressively increased throughout the early  
69 stages of auditory processing. Consistent with psychophysical findings, no changes in the response to the  
70 masker components were observed in the presence of a precursor.

71

## 72 **METHODS**

### 73 **Participants**

74 Ten participants (six female and four male) took part in Experiment 1 and sixteen participants (nine  
75 female and seven male) took part in Experiment 2. The participants were between 18 and 34 years old,  
76 had normal hearing, as defined by audiometric pure-tone thresholds better than 20 dB hearing level (HL)  
77 in both ears at octave frequencies from 250 to 8,000 Hz, and had no reported history of hearing or  
78 neurological disorders. All participants provided written informed consent and were compensated for  
79 their time. All protocols were approved by the University of Minnesota Institutional Review Board.

80

### 81 **Experiment 1: Behavioral measures of enhancement**

82 Perceptual thresholds for a target tone were measured in conditions that did and did not include a  
83 precursor stimulus, in order to confirm and quantify the amount of behavioral enhancement using the  
84 same stimuli that were then employed in the EEG recordings.

85 **Stimuli.** In the simultaneous masker condition with no precursor (MSK), each trial contained an  
86 inharmonic complex tone with five equal-amplitude components spaced apart from each other by 5/11  
87 octaves, followed by a pure-tone probe. The target tone was the 3<sup>rd</sup> component within the complex tone.  
88 The frequency of the probe tone was either the same as the frequency of the target tone, or was  
89 geometrically centered between the frequencies of the target tone and of one of its adjacent neighbors  
90 with equal *a priori* probability. From trial to trial, the frequencies of the entire inharmonic complex were  
91 randomly roved within a one-octave frequency range (with uniform distribution on a logarithmic scale).  
92 This roving led to the frequency of the target tone being anywhere between 1 kHz and 2 kHz on any given  
93 trial. The inharmonic complex and probe tone were each 437.52 ms long, including 10-ms raised-cosine  
94 onset and offset ramps, separated by a 100-ms silent gap. The level of each masker component was 45 dB

95 sound pressure level (SPL). In the enhanced condition (ENH), a precursor was presented before the  
96 inharmonic complex. The four precursor frequencies matched those of the masker in each trial (i.e., no  
97 component at the target frequency). The duration of the precursor was also 437.52 ms, including 10-ms  
98 raised-cosine onset and offset ramps. The delay between the precursor offset and inharmonic complex  
99 onset was 10 ms. In the conditions with amplitude-modulated (AM) tones, the four masker components in  
100 the masker-plus-target complex were amplitude modulated with the sum of two sinusoidal waveforms at  
101 34.28 and 91.42 Hz, each presented at a modulation depth of 25%. The amplitude modulation for the  
102 target component was the sum of two other sinusoidal waveforms at 43.43 and 98.28 Hz, each modulated  
103 at a depth of 50% (Fig. 1a). The probe tone was modulated the same way as the target. The 437.52-ms  
104 duration of inharmonic complex and probe tone ensured an integer number of cycles of all the modulation  
105 frequencies, such that the starting and ending phases were both at zero and consistent for all modulators.  
106 The precursor components were not modulated in the ENH condition (Fig. 1b).

107 **Procedure.** Participants were individually seated in a double-walled sound-attenuating booth. The stimuli  
108 were generated digitally using the AFC software package (Ewert, 2013) under Matlab (Mathworks,  
109 Natick, MA) at a 48-kHz sampling rate, delivered through an L22 soundcard (LynxStudio, Costa Mesa,  
110 CA) with a 24-bit resolution, and presented monaurally to the right ear via HD650 headphones  
111 (Sennheiser, Old Lyme, CT). The task was a present/absent task where the listeners were asked to report  
112 whether or not the probe tone was present in the target-plus-masker complex. The two alternatives (probe  
113 tone present or absent) were presented with equal *a priori* probability. The level of the target tone was  
114 initially set to 65 dB SPL (i.e., 20 dB higher than the individual masker components) and was varied  
115 adaptively following a two-down one-up rule that tracks the 70.7% correct point on the psychometric  
116 function (Levitt, 1971). Feedback was provided after each trial. The level of the probe tone was always  
117 the same as that of the target tone. Initially the level of the target was varied in steps of 5 dB. After two  
118 reversals in the direction of the adaptive tracking procedure, the step size was reduced to 2 dB. The run  
119 was terminated after eight reversals and the threshold was computed as the average target level at the last

120 six reversal points of the tracking procedure. There were four conditions in total, including a simultaneous  
121 masker, or no precursor, condition (MSK) and an enhanced condition (ENH) either with pure tones or  
122 AM tones. Each condition was tested once for each participant. Each participant either started with the  
123 pure tones or the AM tones, with the order counterbalanced between participants. The MSK and ENH  
124 conditions were presented in a different random order for each participant and tone type (pure or AM).  
125 Threshold was defined in terms of the target-to masker ratio (TMR), or the level of the target relative to  
126 the level per component in the remainder of the inharmonic complex.

127 **Screening and training.** Before the main experiment, participants were required to pass two pitch-  
128 discrimination training and screening sessions. In the first session, the participants were presented with  
129 two consecutive pure tones, each 437.52 ms in duration, separated from each other by a silent gap of 100  
130 ms. The two tones were either the same or differed in pitch by the same amount as the target and probe  
131 tones in the main experiment. Participants were asked whether the two tones had the same or different  
132 pitch. In the second session, both tones were amplitude modulated with a sum of two sinusoids at 43.43  
133 and 98.28 Hz with a 50% modulation depth for either frequency. The tones in session 1 and the carriers of  
134 the AM tones in session 2 were roved in frequency from trial to trial in the same way as in the main  
135 experiment. All participants had to obtain at least 80% correct in both sessions to pass. All 10 participants  
136 passed the screening.

137

## 138 **Experiment 2: EEG measures of enhancement**

139 In this experiment, we recorded the auditory steady-state responses to estimate the population neural  
140 responses to the masker tones and target tone separately by tagging them with different signature  
141 amplitude modulation (AM) frequencies.

142 **Stimuli.** The stimuli used for the EEG experiment were the same AM tones used in Experiment 1, but  
143 without the probe tone. All four masker components in the masker-plus-target complex were amplitude

144 modulated with the sum of two sinusoids of 34.28 and 91.42 Hz with 25% modulation depth for each  
145 frequency. The target component was modulated with the sum of two other sinusoids of 43.43 and 98.28  
146 Hz with 50% modulation depth for each frequency. The precursor components in the ENH condition were  
147 not modulated. The duration of the precursor and masker were both 437.52 ms, including 10-ms raised  
148 cosine onset and offset ramps. Both conditions, with precursor (ENH) and without precursor (MSK), were  
149 tested at three target-to-masker ratios (TMRs) of 0, -5 and -10 dB, resulting in a total of six conditions. A  
150 total of 1000 trials were run in each condition for each participant, and the frequencies of the entire  
151 inharmonic complex were randomly roved on each presentation in the same way as in Experiment 1. Half  
152 of the trials were presented in the inverted starting polarity to allow for the cancellation of any stimulus-  
153 related artifacts after recording (Picton et al., 1974; Skoe and Kraus, 2010).

154

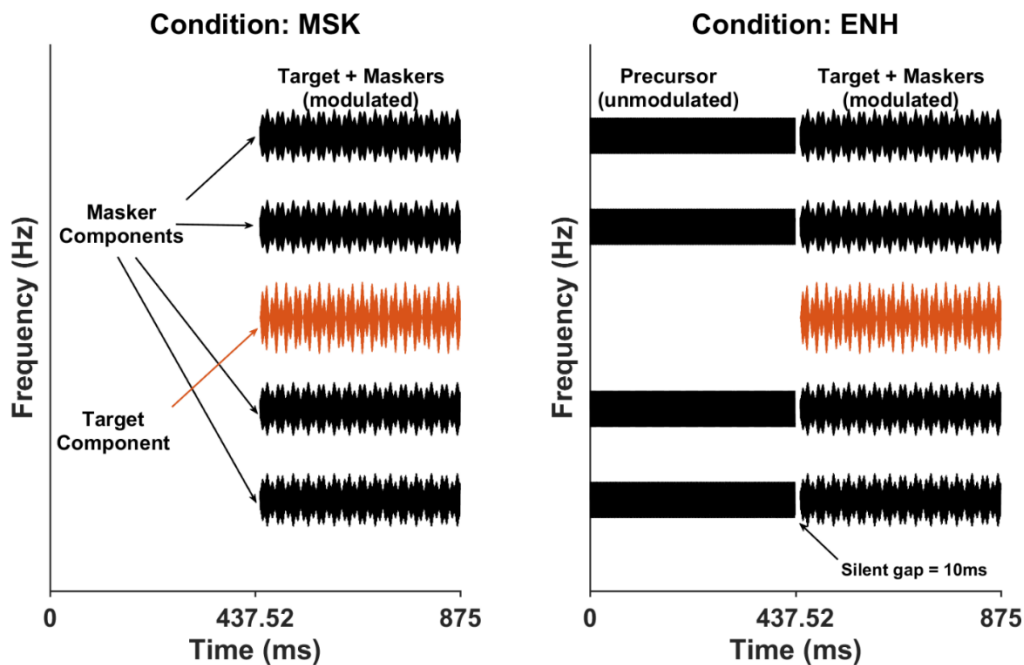

156 **Figure 1:** Schematic diagram of the stimuli with amplitude-modulated tones used in Experiments 1 and 2.  
157 For the behavioral measurements (experiment 1), the target-plus-masker mixture was followed by a  
158 probe tone.



159 **Procedure.** Each participant took part in one experimental session of 2.5 hours, including behavioral  
160 measurements, setup, and EEG data collection. Participants were seated in a double-walled, electrically  
161 shielded, sound-attenuating booth. Each session started with a short behavioral test, with the same  
162 unmodulated stimuli used in Experiment 1, with one run of each of the two conditions, MSK and ENH.  
163 During the EEG data acquisition, participants were fitted with a cap (Easy Cap; Falk Minow Services)  
164 containing 64 silver/silver-chloride scalp electrodes. Two additional reference electrodes, one placed on  
165 each mastoid, and two ocular electrodes were used. The impedance of all electrodes was monitored and  
166 maintained below 10 k $\Omega$ . The EEG data were recorded at a sampling rate of 4096 Hz using a 64-channel  
167 BioSemi system. The sounds were presented via ER-1 insert phones (Etymotic Research, Elk Grove, IL),  
168 and participants watched a silent movie with subtitles during data acquisition. The six conditions (MSK  
169 and ENH conditions presented at three TMRs) were played in a different random order for each  
170 participant.

171 The EEG pre-processing and averaging was done using the EEGLAB toolbox (Delorme and  
172 Makeig, 2004). The raw waveforms were down-sampled to 1024 Hz, re-referenced to the average of the  
173 two mastoids, and bandpass filtered from 1 to 100 Hz using a zero phase-shift filter. For each condition,  
174 the continuous EEG time series was divided into epochs. For the MSK condition, the epoch extended  
175 from 100 ms before stimulus onset to 700 ms post stimulus onset. For the ENH condition, the epoch  
176 extended from 100 ms pre-stimulus onset to 1100 ms post stimulus onset since the stimulus was longer  
177 with the presence of the precursor. The EEG epoched signal was then baseline corrected relative to the  
178 100-ms pre-stimulus baseline. Independent Component Analysis (ICA) was used to remove artefacts  
179 related to eye movements and blinks (Jung et al., 2000).

180 Further analysis was done in MATLAB. The discrete Fourier transforms (DFTs) of the processed  
181 EEG signals were applied to the time-domain waveforms from individual trials and the phases at each  
182 frequency were extracted. For each electrode in each condition for each participant, the phase locking  
183 value (PLV) to the envelope was computed by averaging the phases of the individual trials' responses at

184 each frequency from 400 random samples (drawn with replacement) (Zhu et al., 2013). The average  
185 phases were calculated for the 200 positive polarity trials (POS<sub>*i*</sub>) and 200 negative polarity trials (NEG<sub>*i*</sub>)  
186 separately beforehand (Eq. 1).

$$187 \quad P_i(f) = \frac{1}{400} |(\sum_{n \in \text{POS}_i} e^{i\phi_n(f)} + \sum_{m \in \text{NEG}_i} e^{i\phi_m(f)})| \quad \text{Eq. 1}$$

188 The same procedure was repeated 100 times independently to estimate the distribution of the  
189 PLVs and the mean was calculated as the observed PLVs for one electrode in one condition (Eq. 2).

$$190 \quad P_{ENV}(f) = \frac{1}{100} \sum_{i=1}^{100} P_i(f) \quad \text{Eq.2}$$

191 To evaluate the statistical significance of PLV values, bootstrapping was used to estimate the noise floor.  
192 A null model was tested by generating one random distribution of PLVs by repeating the procedure for  
193 PLV calculation described above 1000 times except that the phase in Eq. 1 was set to be random  
194 (uniformly distributed from 0 to  $2\pi$ , independently selected for each trial and repetition,  $i$ ). The calculated  
195 mean PLV distributions from the experimental data can be compared to this random distribution  
196 (Bonferroni corrected for multiple comparisons): a PLV was significant if the estimate of the probability  
197 of observing it by chance was less than  $p < 0.05/M$  ( $M = 4$ ). In other words, a PLV was significant if  
198 larger than 0.075 (noise floor) in our study. For all these analyses, a subset of 28 electrodes, equally  
199 distributed across both hemispheres, was chosen for analysis. The PLVs were averaged across the subset  
200 of electrodes for each condition of each participant.

201

## 202 **RESULTS**

203 **Behavioral thresholds:** The mean behavioral thresholds for Experiments 1 and 2 are shown in Fig. 2.  
204 The mean behavioral threshold across all participants in Experiment 2 was 13.4 dB TMR in the MSK  
205 condition and -11.1 dB in the ENH condition. These results validated the TMR range (-10 dB to 0 dB  
206 TMR) chosen for the physiological measurements, showing that the selected TMRs included those for

207 which clear behavioral enhancement was observed. The average amount of enhancement calculated as the  
208 difference in thresholds with and without the precursors (MSK - ENH) was 24.5 dB. This value is  
209 comparable to the average enhancement reported by Feng and Oxenham (2015), showing that the  
210 modification of the current stimuli (fewer maskers and smaller roving range) did not noticeably affect the  
211 amount of enhancement. In Experiment 1, the average enhancement was ~20 dB for the modulated and  
212 unmodulated stimuli. A one-way repeated-measures analysis of variance (ANOVA) on the amount of  
213 enhancement with stimulus type (pure tones vs. modulated tones) indicated no significant effect of  
214 stimulus type ( $F_{1,18} = 0.071$ ;  $p = 0.8$ ), suggesting that the additional amplitude modulations used for the  
215 EEG experiment did not affect the amount of enhancement.

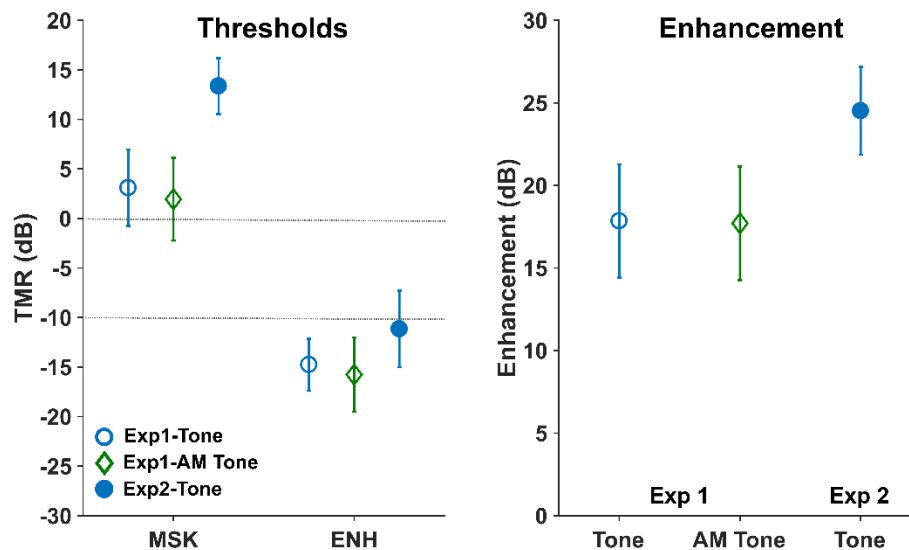

216

217 **Figure 2:** Average behavioral data from Experiments 1 and 2. The panel on the left shows the raw  
218 thresholds for the MSK and ENH conditions for both Experiments 1 and 2. The region between the  
219 dashed lines shows the TMR range used for the stimuli in the EEG experiment. The panel on the right  
220 shows the average enhancement, calculated as the difference in thresholds between MSK and ENH  
221 conditions, for both Experiments 1 and 2.

222

223 **EEG data:** Examples of PLVs for two representative participants are shown in Fig. 3. PLVs below the  
224 noise floor (dashed line) are not significantly greater than expected by chance. There are four distinct  
225 peaks at the four tagging frequencies for maskers and target respectively. Since the ASSR in response to  
226 AM around 40 Hz is thought to be generated in the auditory cortex (Hari et al., 1989; Herdman et al.,  
227 2002), the two peaks near 34 Hz and 43 Hz reflect cortical responses to the maskers and target  
228 respectively. Since the ASSR in response to AM around 100 Hz and above is thought to be produced  
229 primarily by subcortical generators (Bidelman, 2018), the two peaks near 91 Hz and 98 Hz are likely to  
230 reflect subcortical contributions. As shown in Fig. 3, both cortical and subcortical responses to the target  
231 component appear larger in the ENH condition than in the MSK condition.

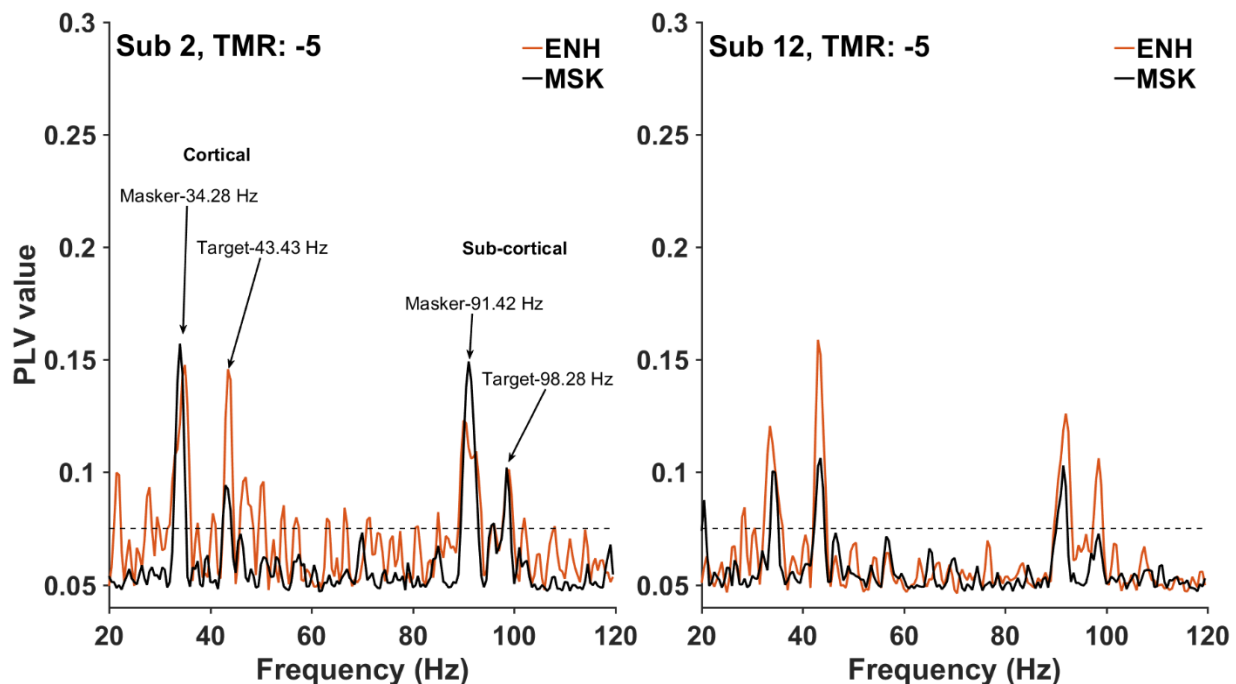

232

233 **Figure 3:** Examples of PLVs from 2 subjects plotted as a function of frequency measured at TMR -5 in  
234 ENH and MSK conditions respectively. Each curve was the averaged PLVs across 28 electrodes. The  
235 arrows pointed to the four distinct peaks at all four tagging frequencies used for the maskers and target.  
236 The orange curves indicate the response in the enhanced condition (ENH) while the black curves  
237 represent the response in the simultaneous condition (MSK). Note that the amplitude of the PLV for the

238 *masker components remain similar in both conditions (MSK and ENH) whereas the target component*  
239 *amplitudes are enhanced in the ENH conditions. The dashed line indicates the noise floor.*

240

241         The average responses over 17 participants are plotted in Fig. 4 as a function of the TMR. As the  
242 TMR increased, the response to the target embedded in the simultaneous masker (MSK condition) tended  
243 to increase (dashed orange lines). When a precursor was present (ENH condition), the responses to the  
244 target were enhanced compared to the MSK condition with no precursor (solid orange lines). The  
245 enhancement in the neural responses to the target appeared more pronounced at the cortical level (Fig. 4,  
246 left panel). In contrast, the responses to the masker did not vary with TMR and did not appear to be  
247 affected by the presence of the precursor (black lines). The amount of enhancement was calculated as the  
248 difference in PLV between the ENH and MSK conditions, shown in Fig. 5. Separate two-way within-  
249 subjects (repeated-measures) ANOVAs on the amount of enhancement were performed for both cortical  
250 and subcortical PLVs with factors of TMR (0,-5,-10 dB) and stimulus component (target or masker). For  
251 the cortical responses, there was a significant main effect of stimulus component ( $F_{1,16} = 42.4, p < 0.001$ ).  
252 There was no significant effect of TMR ( $F_{2,32} = 0.38, p = 0.687$ ) and no significant interaction between  
253 the two factors ( $F_{2,32} = 0.12, p = 0.89$ ). Similarly, for the subcortical responses, there was a significant  
254 main effect of stimulus component ( $F_{1,16} = 7.24, p = 0.016$ ) but no significant effect of TMR ( $F_{2,32} = 0.66,$   
255  $p = 0.52$ ) and no interaction ( $F_{2,32} = 1.58, p = 0.23$ ).

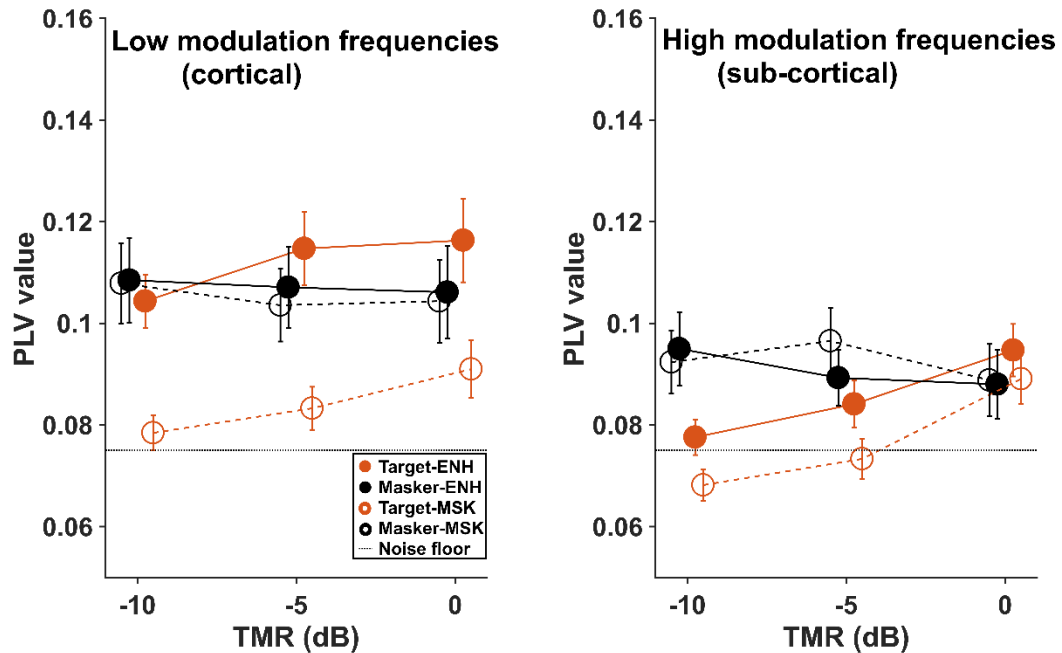

256

257 **Figure 4:** Average PLVs across all participants for both low (left) and high (right) tagging frequencies  
258 for all components across TMRs. The error bars represent the standard error of the mean.

259

260 Since the ANOVAs showed that enhancement does not depend on TMRs, we averaged the  
261 enhancement across all three TMRs for the target and masker respectively for further analysis. A one-  
262 sampled *t*-test was applied for the averaged enhancement at both the cortical and subcortical frequencies.  
263 For both cortical and subcortical frequencies, the enhancement for the target component was significantly  
264 different from zero (Cortical:  $t_{16} = 7.1, p < 0.001$ ; Subcortical:  $t_{16} = 2.38, p = 0.03$ ). In contrast, the  
265 enhancement of the masker components were not significantly different from zero (Cortical:  $t_{16} = 0.81, p$   
266  $= 0.43$ ; Subcortical:  $t_{16} = 0.57, p = 0.58$ ). In order to investigate whether the enhancement in target  
267 responses differs at two auditory process stages, we conducted a two-way repeated-measures ANOVA on  
268 the enhancement in target responses with tagging frequency (cortical or subcortical) and TMR as within-  
269 subjects factors. There was a significant main effect of tagging frequency [ $F(1, 16) = 19.82, p < 0.001$ ].  
270 However, neither the effect of TMR [ $F(2,32) = 0.79, p = 0.461$ ] nor the interaction between the two

271  $[F(2,32) = 0.15, p = 0.86]$  was significant, confirming that the amount of enhancement was smaller  
272 overall at the sub-cortical level, but that the independence with TMR was the same at both levels.

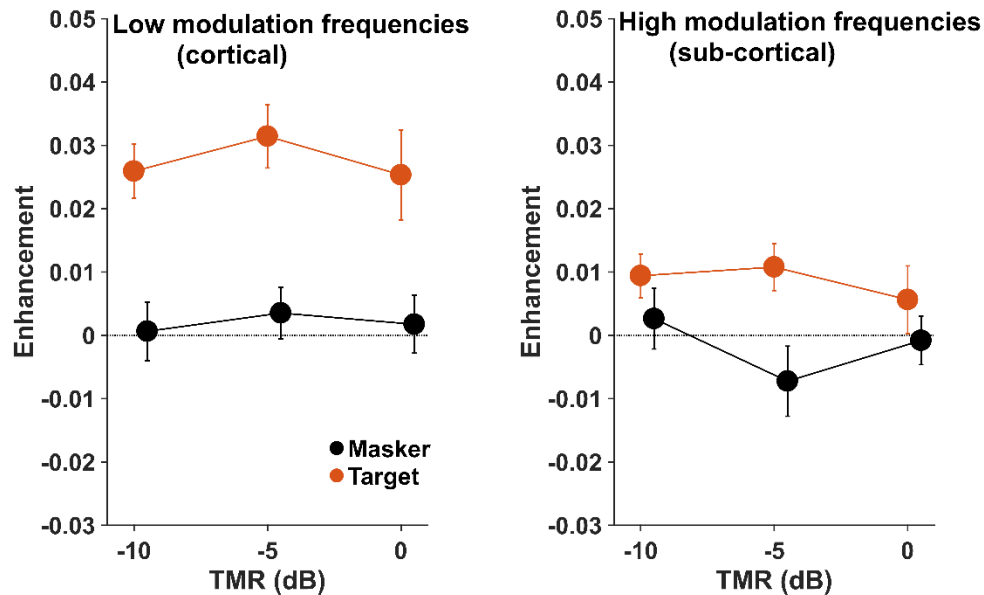

273

274 **Figure 5:** Average enhancement seen as a difference in PLVs between the ENH and MSK conditions for  
275 the target and masker components across all TMRs for both low (left) and high (right) tagging  
276 frequencies. The error bars represent the standard error of the mean.

277

## 278 DISCUSSION

279 The current study provides evidence for neural correlates of auditory enhancement in humans. These  
280 neural correlates were observed at both sub-cortical and cortical levels in humans using ASSRs with a  
281 combination of both fast (~100 Hz) and slow (~40 Hz) amplitude modulations. In line with behavioral  
282 data from earlier studies (Viemeister and Bacon, 1982; Wang and Oxenham, 2016), enhancement of the  
283 response to the target was observed together with no change in the responses to the masker. The stronger  
284 enhancement of the target with the 40-Hz ASSR than with the 100-Hz ASSR suggest stronger correlates  
285 of enhancement at the cortical than at the subcortical levels.

## 286 **Neural gain and behavioral thresholds**

287 The enhanced neural responses to the target in the presence of the precursor in our current study could  
288 correlate with the perceptual “pop-out” of the target measured psychophysically. However, it is still not  
289 clear how the neural representations are decoded or read out quantitatively to determine the perceptual  
290 thresholds. For instance, in the MSK condition, the average behavioral threshold is over 10 dB TMR (Fig.  
291 2), even though there is robust neural representation of the target at 0 dB TMR or lower (40-Hz ASSR).  
292 Assuming that the behavioral threshold to hear out the target tone from the masker for pitch comparison  
293 requires the neural responses to the target to exceed a certain threshold, the behavioral enhancement  
294 should be reflected in the difference of TMRs which yield the same PLVs in the MSK and ENH  
295 conditions (orange lines in Fig. 4). For instance, the average PLV of the cortical response (left panel in  
296 Fig. 4) at -10 TMR in the ENH condition is equivalent to the PLV in the MSK condition with  $TMR \geq 0$   
297 dB. In this case, the cortical responses would predict at least 10 dB enhancement behaviorally. In the  
298 meantime, the subcortical responses (right panel in Fig. 4) would predict an effect size of approximately 5  
299 dB. In this case, the predictions from the cortical responses align more closely with the 20 dB or more of  
300 enhancement measured behaviorally in our current study.

301 A previous study by Carcagno et al. (2014) did not find evidence of enhancement in the 80-Hz  
302 ASSRs. There are a few possible reasons to explain the apparent discrepancy between their findings and  
303 ours. In their paradigm, the expected behavioral enhancement was only about 5 dB, whereas our paradigm  
304 yielded 20-25 dB enhancement. Part of the difference in behavioral outcomes may be due to our use of  
305 frequency roving from trial to trial, which reduces the possibility of contamination via longer-term  
306 adaptation effects between trials (Feng and Oxenham, 2015). Since the change in the phase-locked  
307 responses at the subcortical level might not be sufficient to account for the behavioral threshold, as  
308 suggested in our current study, it is likely to be more difficult to detect the neural changes for a smaller  
309 behavioral effect size. In addition, the previous study only tested one target level, which was equivalent to  
310 0 dB TMR in our study. Although enhancement does not depend on TMR statistically, we did notice that



311 the enhancement in the subcortical response tended to be smallest at 0 dB TMR. The neural mechanisms  
312 for enhancement might operate primarily when the target level is lower than the masker level, since the  
313 inhibition effects are strongest in single neurons of central auditory system when the masker level is  
314 higher than the target level (Suga and Tsuzuki, 1985; Ehret and Merzenich, 1988; Lu and Jen, 2002).

315         Since the ASSRs are sensitive to loudness growth (Menard et al., 2008), the enhanced target  
316 responses in the presence of the precursor may reflect the increase in the neural gain of the target  
317 intensity. Such intensity changes might be related to the perceived partial loudness increase of the target  
318 equivalent to a 10 dB intensity change (Wang and Oxenham, 2016), as well as the increased effective  
319 level (4- 5 dB) of the target monaurally, such that a lateralized percept is produced when combining the  
320 target tone with a contralateral tone at the same frequency and phase (Byrne et al., 2011). Another study  
321 estimated that the level of the target in the MSK condition would need to be raised by 23 dB to equal the  
322 salience of the target in the ENH condition (Byrne et al., 2013). It is possible that the cortical responses  
323 also reflect (or are responsible for) the increase in saliency of the target in the ENH condition when the  
324 target is introduced within the maskers as the new event or object, which activates the bottom-up control  
325 of attention deployment (Itti and Koch, 2001; Kayser et al., 2005).

326

### 327 **Possible neural mechanisms of auditory enhancement**

328 One possible neural mechanism underlying auditory enhancement is the adaptation of inhibition  
329 (Viemeister and Bacon, 1982). In the central auditory system, starting from the cochlear nucleus, across-  
330 frequency processing starts to emerge, where neurons selective to one center frequency can be laterally  
331 suppressed or inhibited by neighboring frequencies (Aitkin, 1986; Rhode and Greenberg, 1994). When a  
332 complex tone is presented, the neurons that respond to each component also mutually inhibit each other.  
333 Since the frequency specific responses are known to adapt over time (Ulanovsky et al., 2003; Malmierca  
334 et al., 2009), it is possible that this form of inhibition adapts in a similar way. In the ENH condition, the

335 inhibition to the target response from the masker may be adapted by the precursor, resulting in an increase  
336 in the target response. Previous studies on single neurons have found evidence for this mechanism by  
337 showing increased neural firings in the cochlear nucleus (Scutt and Palmer, 1998) and inferior colliculus  
338 (Nelson and Young, 2010). In the current study, we also observed enhancement effects in phase-locked  
339 responses of neural populations in both the subcortical and auditory cortical responses of human subjects.  
340 Interestingly, our results also show that the masker responses remain unchanged in the presence of the  
341 precursor (Fig. 4). This lack of adaptation in the masker responses, which is consistent with findings of  
342 Carcagno et al. (2014), could also be explained by the adaptation of inhibition mechanism: since neurons  
343 responding to the four maskers are laterally inhibited by each other, the responses to the maskers decrease  
344 due to adaptation from the precursor, but this adaptation may be counteracted by the adaptation of the  
345 lateral inhibition, leading to no net change in responses.

346

#### 347 **Inherited or emergent?**

348 In the current study, the enhanced neural responses to the target were reflected in both 40-Hz and 100-Hz  
349 ASSRs. However, the effects are larger in the 40-Hz ASSRs. If these responses are interpreted as  
350 emerging from the sub-cortical and cortical regions respectively, the results support the earlier indirect  
351 indications from animal studies that enhancement accumulates along the ascending auditory pathways.  
352 Although the interpretation of the 40-Hz ASSRs as reflecting neural activity in the auditory cortex is  
353 widely accepted, the origin of the 100-Hz ASSRs is still the topic of some debate. One recent study  
354 showed that cortical contributions dominate FFRs to the voice pitch ( $F_0 = 100$  Hz) of speech in MEG  
355 (Coffey et al., 2016) and this conclusion was supported by another study which showed a correlation  
356 between the strength of FFRs to  $F_0$  in EEG and BOLD signal in the right posterior auditory cortex of  
357 fMRI (Coffey et al., 2017). However, there is a natural bias of MEG to superficial brain tissue (Hillebrand  
358 and Barnes, 2002) and the relation between the BOLD signal in fMRI and underlying neural activity still  
359 remains an open question (Ekstrom, 2010). In addition, a more recent study by Bidelman (2018) showed

360 that subcortical structures (auditory nerves and brainstem) make the largest contribution to FFRs recorded  
361 in EEG and primary auditory cortex showed little FFR energy above 100 Hz.

362 It is difficult to validate the neural locus of enhancement from surface EEG measurements. It is  
363 possible that the enhanced target responses emerge in IC, as suggested by the increased amplitude of 100-  
364 Hz ASSRs in our study and enhanced firing rate of single neurons (Nelson and Young, 2010). The  
365 enhancement in neural responses in IC could be further amplified by additional cortical processes to  
366 account for the threshold changes in psychophysical measurements. Alternatively, enhancement could  
367 have a cortical origin and the neural enhancement observed in the brainstem could come from descending  
368 (efferent) corticofugal projections (Winer, 2005). Electrical stimulation of cortical neurons could result in  
369 the augmented responses of neurons with matched best frequencies, but it takes several minutes to  
370 develop (Ma and Suga, 2001). The actual sound stimulation might activate this modulatory system more  
371 quickly. Although it is difficult to fully address the question of the origin of auditory enhancement in  
372 human studies, future studies using animal models may shed some light on this important issue by  
373 examining the neural responses in the brainstem when corticofugal neurons are deactivated by cooling,  
374 optogenetic silencing, or other pharmaceutical manipulations.

375 To summarize, our study showed that the double-modulation tagging method can be used to  
376 probe the neural responses of individual components in a complex tone mixture at both subcortical and  
377 cortical levels simultaneously. Our results also revealed the first clear neural correlates of the important  
378 perceptual phenomenon of auditory enhancement. The fact that the enhancement was more pronounced in  
379 cortical responses than subcortical responses in our results suggests that enhancement may emerge in  
380 subcortical structures and may accumulate along the auditory pathway. The mechanisms of this  
381 accumulation, whether it is achieved via feedforward or feedback mechanisms, awaits further study.

## 382 **ACKNOWLEDGEMENTS**

383 This study was supported by NIH grant R01 DC012262. We thank Patria Leach for helping data  
384 collection.

385

386 **REFERENCES**

- 387 Aitkin L (1986) Discharge characteristics of units in the auditory midbrain. In: *The Auditory Midbrain: Structure and Function in the Central Auditory Pathway*, pp 101-128. Clifton, N.J.: Humana  
388 Press.  
389
- 390 Barlow HB (1961) Possible principles underlying the transformation of sensory messages. In: *Sensory Communication* (Rosenblith W, ed), pp 217-234. Cambridge, MA: MIT Press.  
391
- 392 Beim JA, Elliott M, Oxenham AJ, Wojtczak M (2015) Stimulus frequency otoacoustic emissions provide  
393 no evidence for the role of efferents in the enhancement effect. *J Assoc Res Otolaryngol* 16:613-  
394 629.
- 395 Bidelman GM (2018) Subcortical sources dominate the neuroelectric auditory frequency-following  
396 response to speech. *NeuroImage* 175:56-69.
- 397 Byrne AJ, Stellmack MA, Viemeister NF (2011) The enhancement effect: evidence for adaptation of  
398 inhibition using a binaural centering task. *J Acoust Soc Am* 129:2088-2094.
- 399 Byrne AJ, Stellmack MA, Viemeister NF (2013) The salience of enhanced components within  
400 inharmonic complexes. *J Acoust Soc Am* 134:2631-2634.
- 401 Carcagno S, Plack CJ, Portron A, Semal C, Demany L (2014) The auditory enhancement effect is not  
402 reflected in the 80-Hz auditory steady-state response. *J Assoc Res Otolaryngol* 15:621-630.
- 403 Coffey EB, Herholz SC, Chepesiuk AM, Baillet S, Zatorre RJ (2016) Cortical contributions to the  
404 auditory frequency-following response revealed by MEG. *Nat Commun* 7:11070.
- 405 Coffey EBJ, Musacchia G, Zatorre RJ (2017) Cortical correlates of the auditory frequency-following and  
406 onset responses: EEG and fMRI Evidence. *J Neurosci* 37:830-838.
- 407 Dean I, Harper NS, McAlpine D (2005) Neural population coding of sound level adapts to stimulus  
408 statistics. *Nat Neurosci* 8:1684-1689.

- 409 Delorme A, Makeig S (2004) EEGLAB: an open source toolbox for analysis of single-trial EEG  
410 dynamics including independent component analysis. *J Neurosci Methods* 134:9-21.
- 411 Demany L, Carcagno S, Semal C (2013) The perceptual enhancement of tones by frequency shifts. *Hear*  
412 *Res* 298:10-16.
- 413 Ehret G, Merzenich MM (1988) Complex sound analysis (frequency resolution, filtering and spectral  
414 integration) by single units of the inferior colliculus of the cat. *Brain Res* 472:139-163.
- 415 Ekstrom A (2010) How and when the fMRI BOLD signal relates to underlying neural activity: the danger  
416 in dissociation. *Brain Res Rev* 62:233-244.
- 417 Erviti M, Semal C, Demany L (2011) Enhancing a tone by shifting its frequency or intensity. *J Acoust*  
418 *Soc Am* 129:3837-3845.
- 419 Ewert SD (2013) A modular framework for running psychoacoustic experiments and computational  
420 perception models. In: *International Conference on Acoustics AIA-DAGA*, pp 1326-1329.  
421 Merano, Italy.
- 422 Feng L, Oxenham AJ (2015) New perspectives on the measurement and time course of auditory  
423 enhancement. *J Exp Psychol Hum Percept Perform* 41:1696-1708.
- 424 Hari R, Hamalainen M, Joutsiniemi SL (1989) Neuromagnetic steady-state responses to auditory stimuli.  
425 *J Acoust Soc Am* 86:1033-1039.
- 426 Hartmann WM, Goupell MJ (2006) Enhancing and unmasking the harmonics of a complex tone. *J Acoust*  
427 *Soc Am* 120:2142-2157.
- 428 Herdman AT, Lins O, Van Roon P, Stapells DR, Scherg M, Picton TW (2002) Intracerebral sources of  
429 human auditory steady-state responses. *Brain Topogr* 15:69-86.
- 430 Hillebrand A, Barnes GR (2002) A quantitative assessment of the sensitivity of whole-head MEG to  
431 activity in the adult human cortex. *NeuroImage* 16:638-650.
- 432 Itti L, Koch C (2001) Computational modelling of visual attention. *Nat Rev Neurosci* 2:194-203.
- 433 Jung TP, Makeig S, Humphries C, Lee TW, McKeown MJ, Iragui V, Sejnowski TJ (2000) Removing  
434 electroencephalographic artifacts by blind source separation. *Psychophysiology* 37:163-178.

- 435 Kayser C, Petkov CI, Lippert M, Logothetis NK (2005) Mechanisms for allocating auditory attention: an  
436 auditory saliency map. *Curr Biol* 15:1943-1947.
- 437 Levitt H (1971) Transformed up-down methods in psychoacoustics. *J Acoust Soc Am* 49:467-477.
- 438 Lu Y, Jen PH (2002) Interaction of excitation and inhibition in inferior collicular neurons of the big  
439 brown bat, *Eptesicus fuscus*. *Hear Res* 169:140-150.
- 440 Ma X, Suga N (2001) Plasticity of bat's central auditory system evoked by focal electric stimulation of  
441 auditory and/or somatosensory cortices. *J Neurophysiol* 85:1078-1087.
- 442 Malmierca MS, Cristaudo S, Perez-Gonzalez D, Covey E (2009) Stimulus-specific adaptation in the  
443 inferior colliculus of the anesthetized rat. *J Neurosci* 29:5483-5493.
- 444 Menard M, Gallego S, Berger-Vachon C, Collet L, Thai-Van H (2008) Relationship between loudness  
445 growth function and auditory steady-state response in normal-hearing subjects. *Hear Res*  
446 235:105-113.
- 447 Nelson PC, Young ED (2010) Neural correlates of context-dependent perceptual enhancement in the  
448 inferior colliculus. *J Neurosci* 30:6577-6587.
- 449 Palmer AR, Summerfield Q, Fantini DA (1995) Responses of auditory-nerve fibers to stimuli producing  
450 psychophysical enhancement. *J Acoust Soc Am* 97:1786-1799.
- 451 Picton TW, Hillyard SA, Krausz HI, Galambos R (1974) Human auditory evoked potentials. I. Evaluation  
452 of components. *Electroencephalogr Clin Neurophysiol* 36:179-190.
- 453 Rhode WS, Greenberg S (1994) Lateral suppression and inhibition in the cochlear nucleus of the cat. *J*  
454 *Neurophysiol* 71:493-514.
- 455 Scutt MJ, Palmer AR (1998) Physiological enhancement in cochlear nucleus using single tone precursors.  
456 In: *Assoc. Res. Otolaryngol. Abs.*, p 188(A).
- 457 Skoe E, Kraus N (2010) Auditory brain stem response to complex sounds: a tutorial. *Ear Hear* 31:302-  
458 324.

- 459 Stilp CE, Alexander JM, Kieft M, Kluender KR (2010) Auditory color constancy: calibration to reliable  
460 spectral properties across nonspeech context and targets. *Attention, perception & psychophysics*  
461 72:470-480.
- 462 Suga N, Tsuzuki K (1985) Inhibition and level-tolerant frequency tuning in the auditory cortex of the  
463 mustached bat. *J Neurophysiol* 53:1109-1145.
- 464 Ulanovsky N, Las L, Nelken I (2003) Processing of low-probability sounds by cortical neurons. *Nat*  
465 *Neurosci* 6:391-398.
- 466 Viemeister NF (1980) Adaptation of masking. In: *Psychophysical, Physiological and Behavioural Studies*  
467 *in Hearing* (van den Brink G, Bilsen FA, eds), pp 190-198. Delft, The Netherland: Delft  
468 University Press.
- 469 Viemeister NF, Bacon SP (1982) Forward masking by enhanced components in harmonic complexes. *J*  
470 *Acoust Soc Am* 71:1502-1507.
- 471 Viemeister NF, Byrne AJ, Stellmack MA (2013) Spectral and level effects in auditory signal  
472 enhancement. *Adv Exp Med Biol* 787:167-174.
- 473 Wang N, Oxenham AJ (2016) Effects of auditory enhancement on the loudness of masker and target  
474 components. *Hear Res* 333:150-156.
- 475 Winer JA (2005) Decoding the auditory corticofugal systems. *Hear Res* 207:1-9.
- 476 Zhu L, Bharadwaj H, Xia J, Shinn-Cunningham B (2013) A comparison of spectral magnitude and phase-  
477 locking value analyses of the frequency-following response to complex tones. *J Acoust Soc Am*  
478 134:384-395.
- 479
